# Supplementary material for: Epigallocatechin-3-Gallate Attenuates Myocardial Dysfunction via Inhibition of Endothelial-to-Mesenchymal Transition
Source: MDPI journal article supplement (doi:10.3390/antiox12051059), 2023-05-07

## Supporting information

**Supplementary Table S1.** Primer sequences used for qRT-PCR

| Primer name   | Primer Sequence 5'→3'              | T <sub>m</sub> (°C) |
|---------------|------------------------------------|---------------------|
| COLIAI        | Forward: ATGGATTCCCGTTCGAGTACG     | 59                  |
|               | Reverse: TCAGCTGGATAGCGACATCG      |                     |
| FSPI          | Forward: TCAGGCAAAGAGGGTGACAAG     | 60                  |
|               | Reverse: AGGCAGCTCCCTGGTCAGT       |                     |
| SNAIL         | Forward: GATGAGGACAGTGGCAAAAGCTC   | 61                  |
|               | Reverse: AGAATGGCTTCTCACCAGTGTGG   |                     |
| TGF $\beta$ I | Forward: AGATTAAAATCAAGTGTGGAGCAAC | 59                  |
|               | Reverse: GTCCTTCCTAAAGTCAATGTACAGC |                     |
| VIMENTIN      | Forward: GGTACAAGTCCAAGTTTGCTGACCT | 61                  |
|               | Reverse: CATTGAGCAGATCTTGGTATTCACG |                     |
| GAPDH         | Forward: CATCACTGCCACCCAGAAGACTG   | 60                  |
|               | Reverse: ATGCCAGTGAGCTTCCC GTTCAG  |                     |

Supplementary Figure S1. High-quality figures of Figure 4C

MI Snail

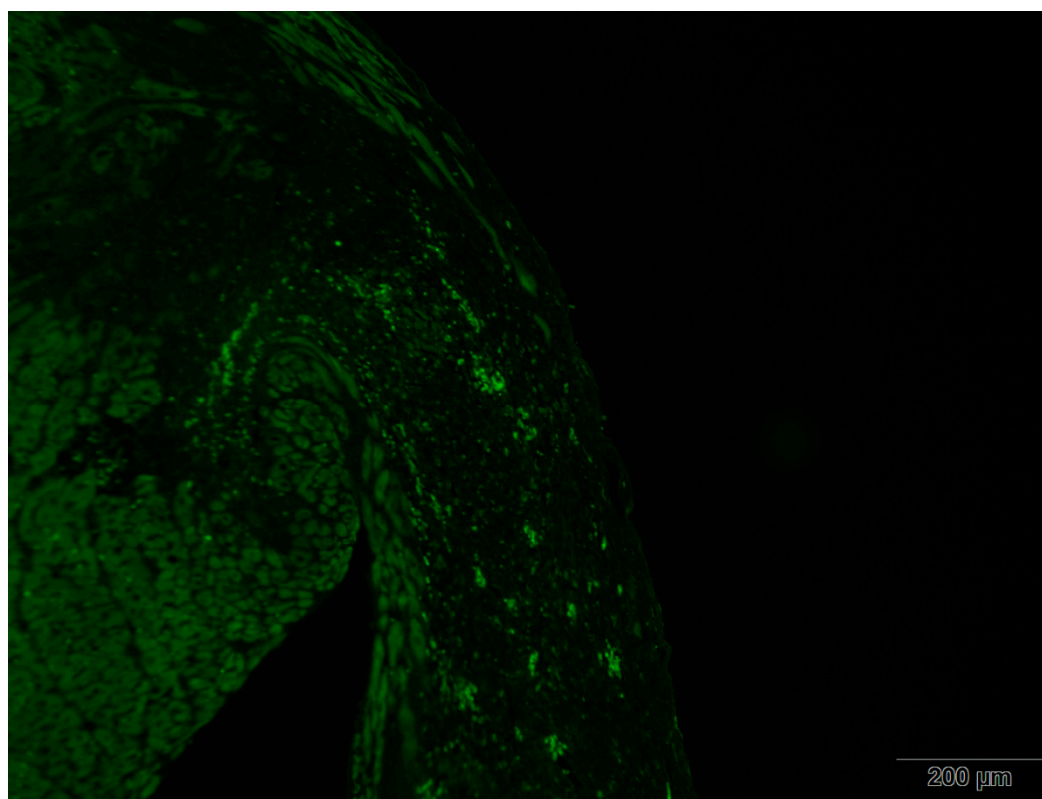

MI DAPI

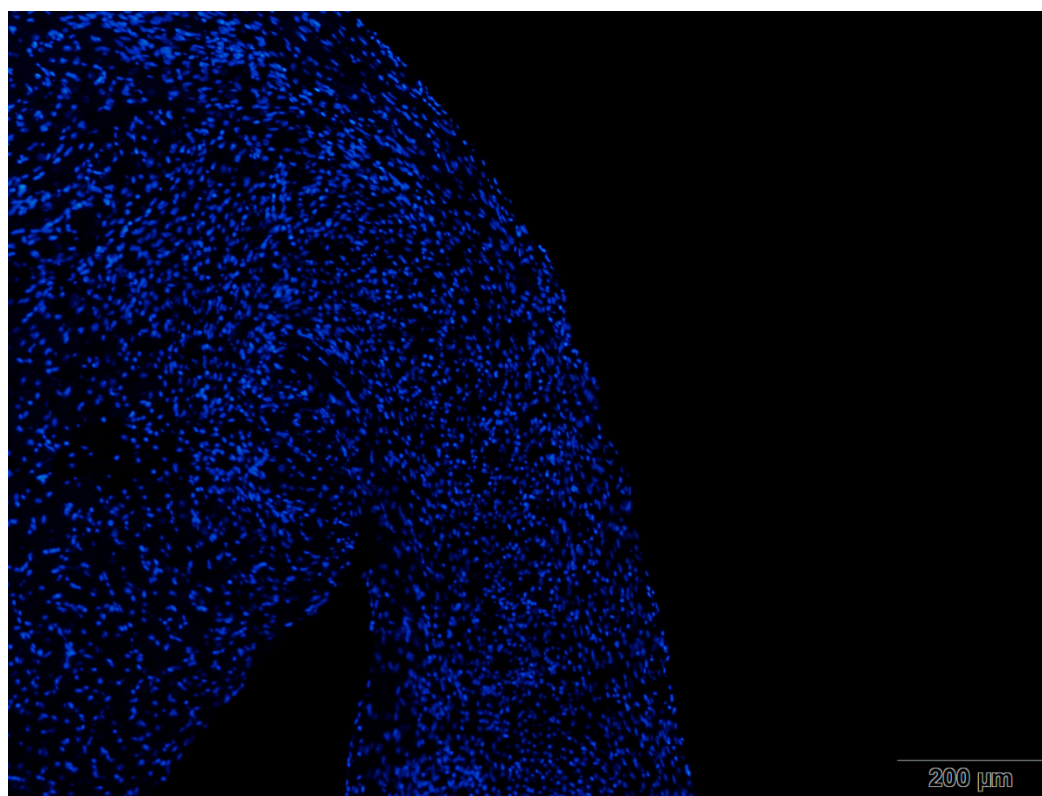

MI Merge

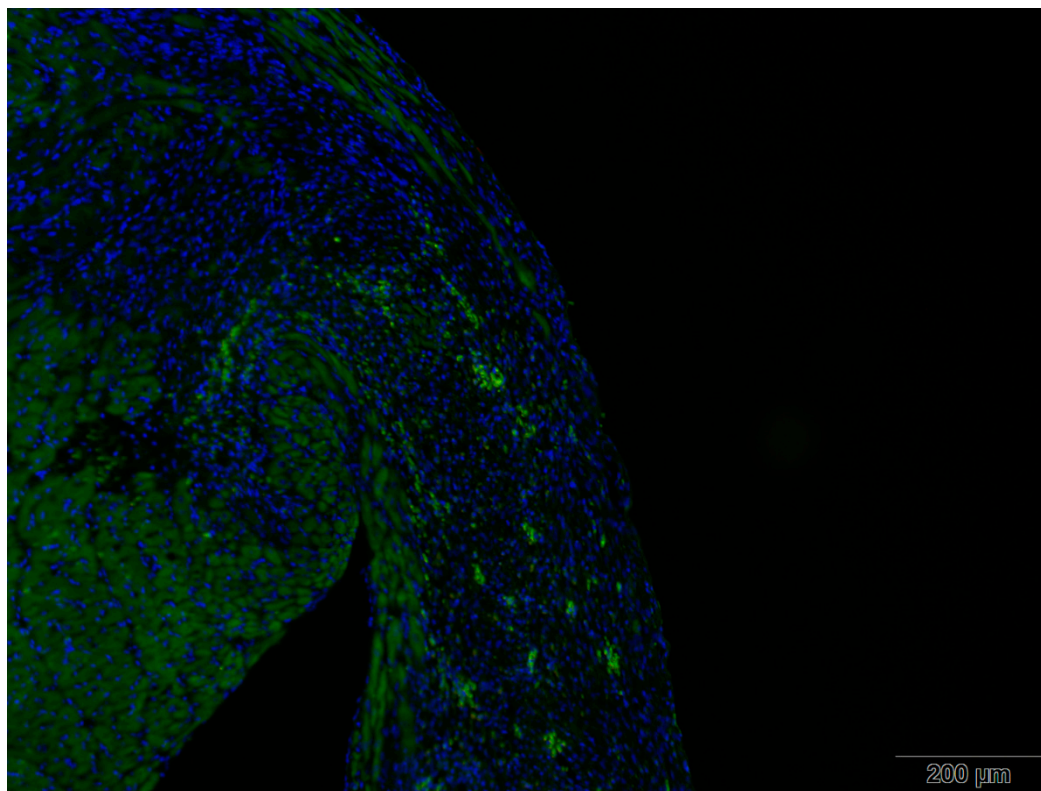

MI+EGCG Snail

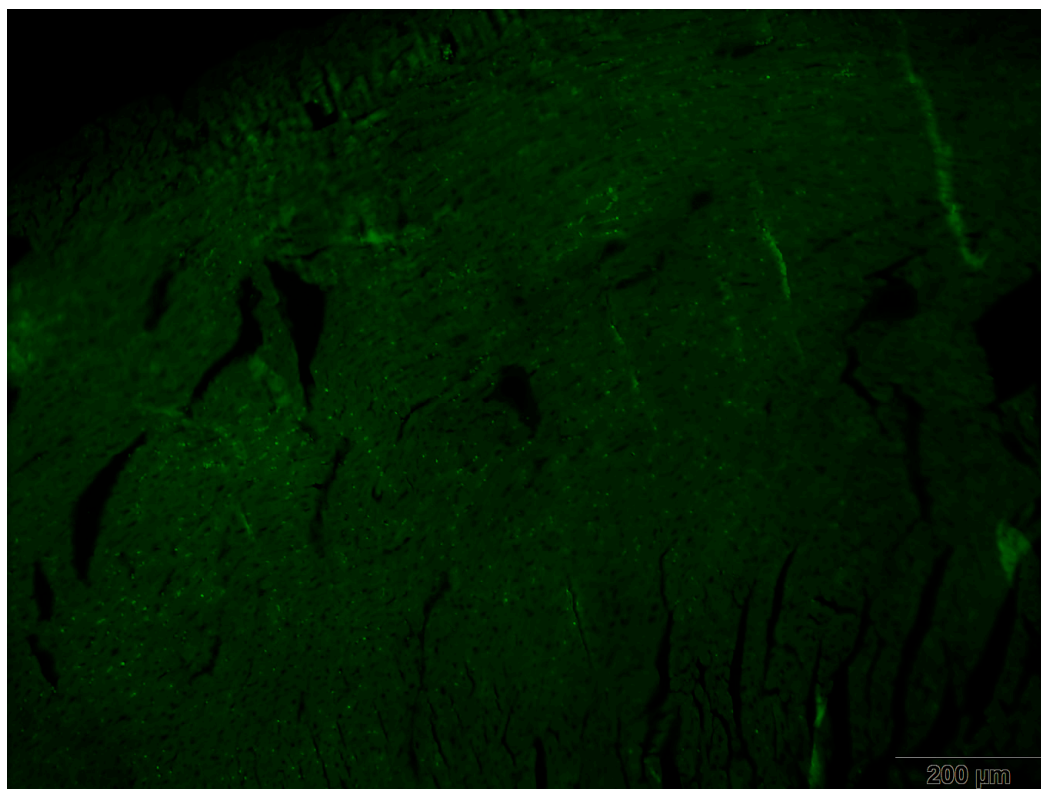



MI+EGCG DAPI

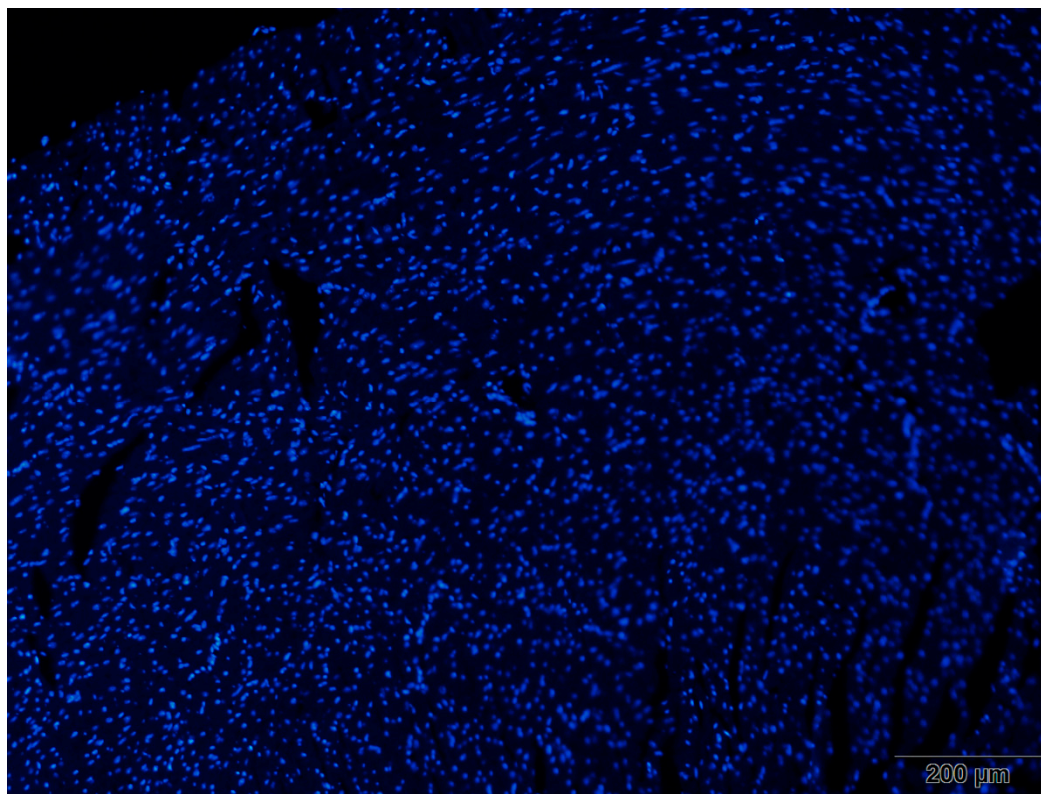

MI+EGCG Merge

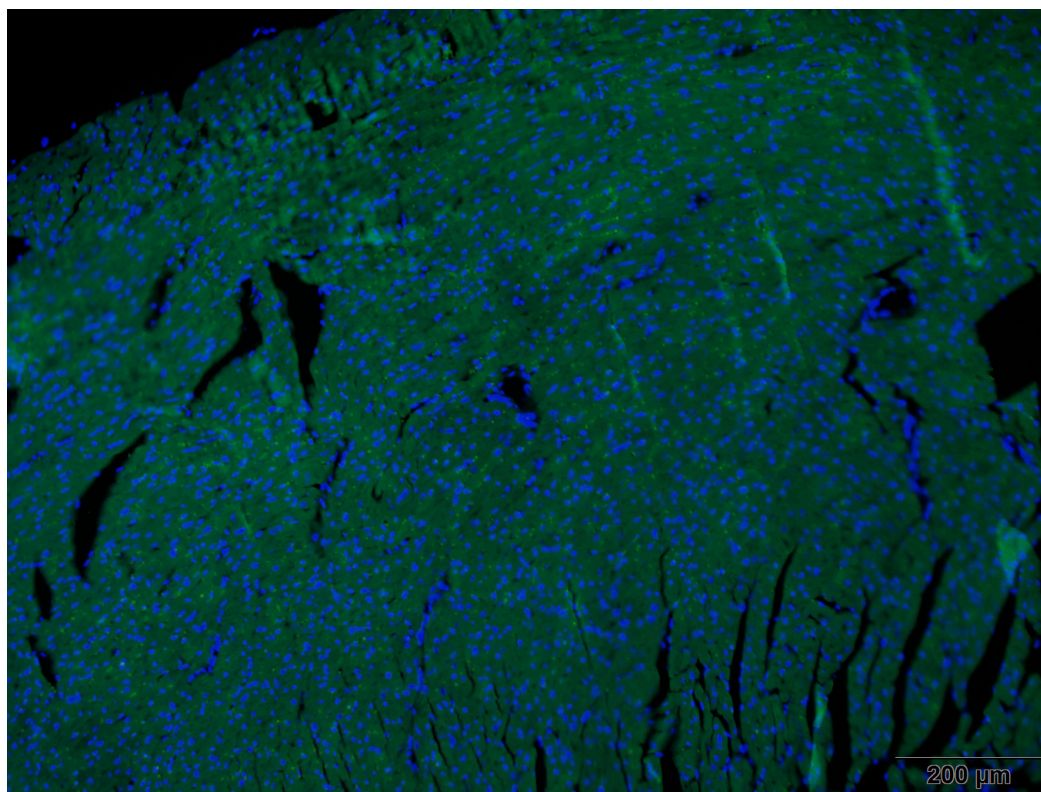

Supplementary Figure S2. High-quality figures of Figure 5B

MI 7-AAD

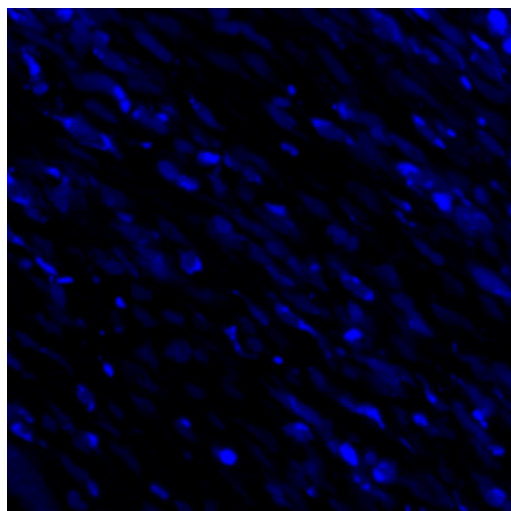

MI Br-dUTP

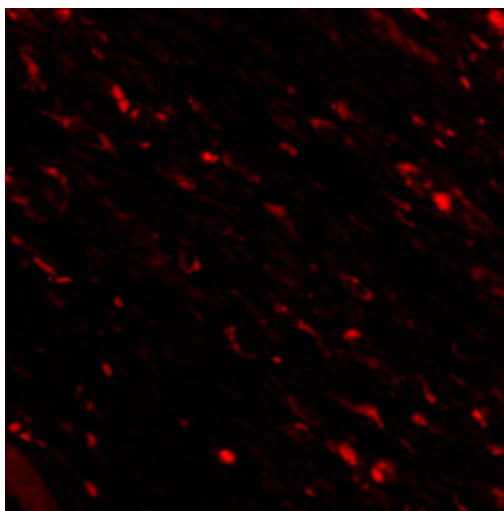

MI Merge

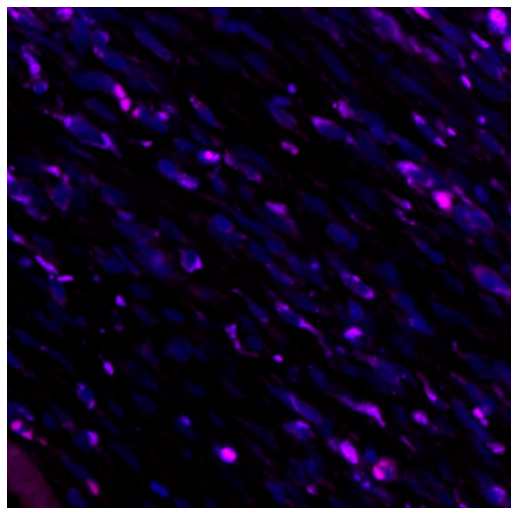

MI+EGCG 7-AAD

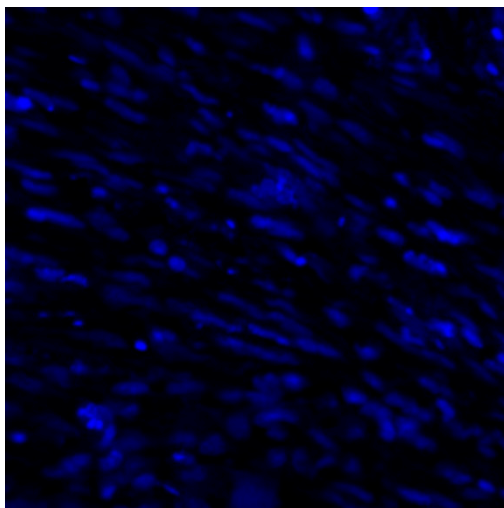

MI+EGCG Br-dUTP

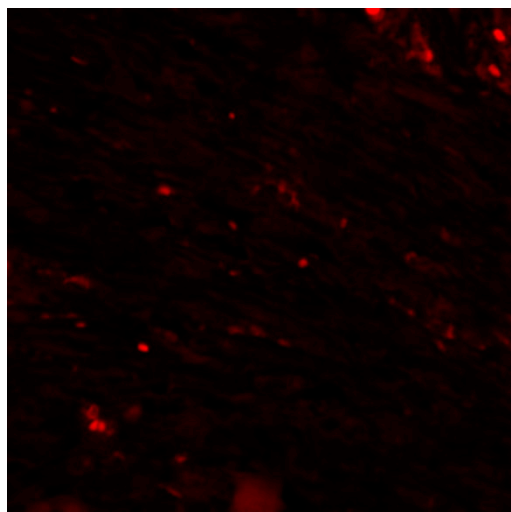

MI+EGCG Merge

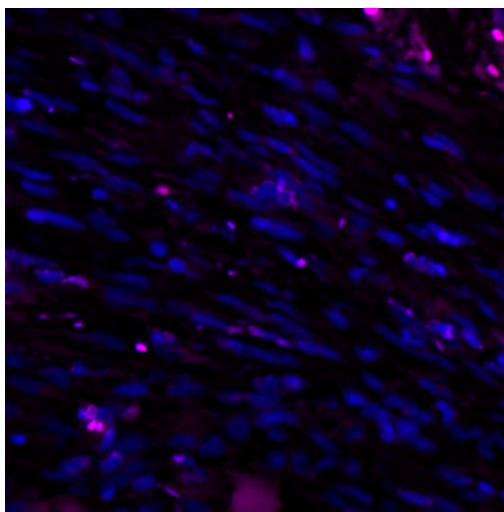



Supplementary Figure S3. High-quality figures of Figure 5D

MI CD31

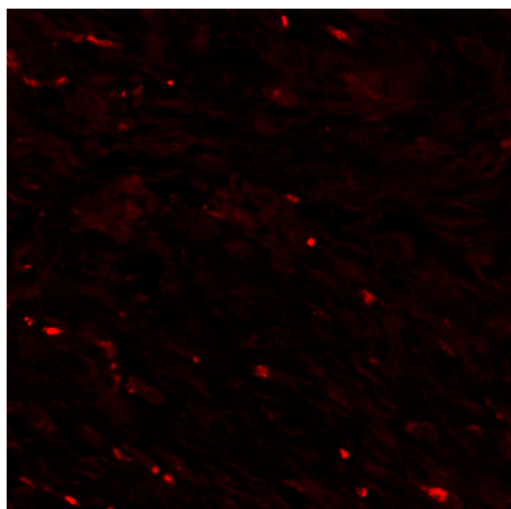

MI DAPI

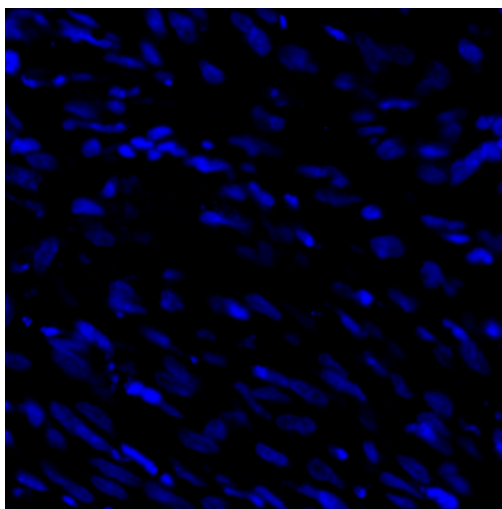

MI Merge

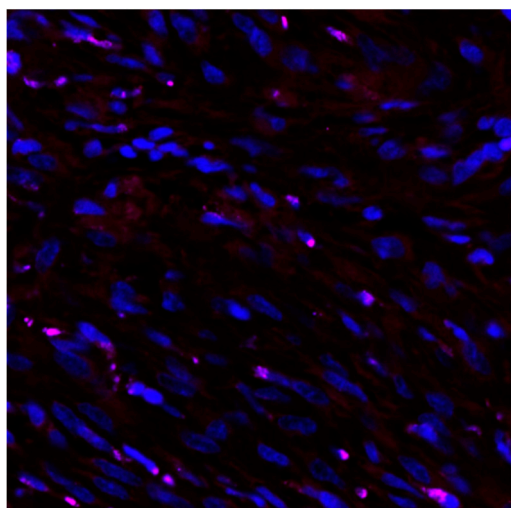

MI+EGCG CD31

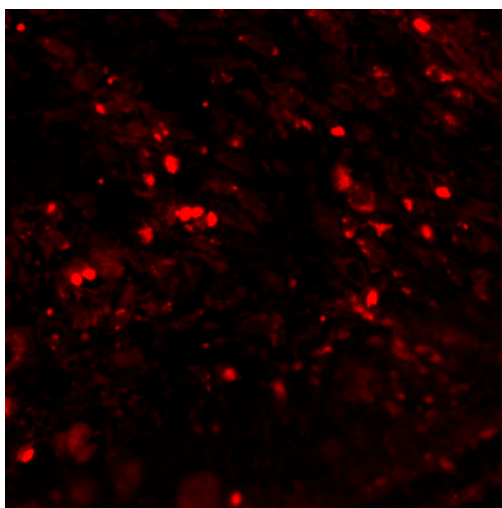

MI+EGCG DAPI

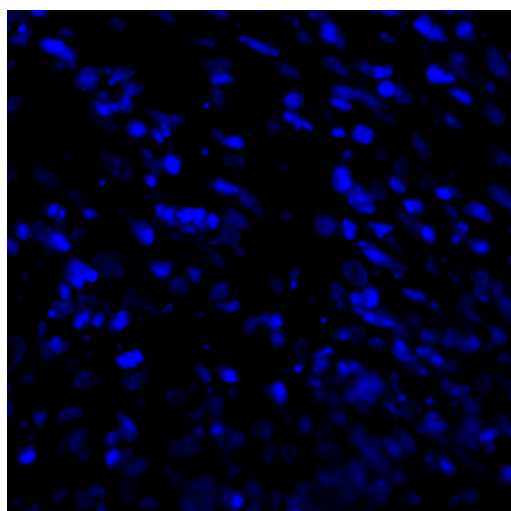

MI+EGCG Merge

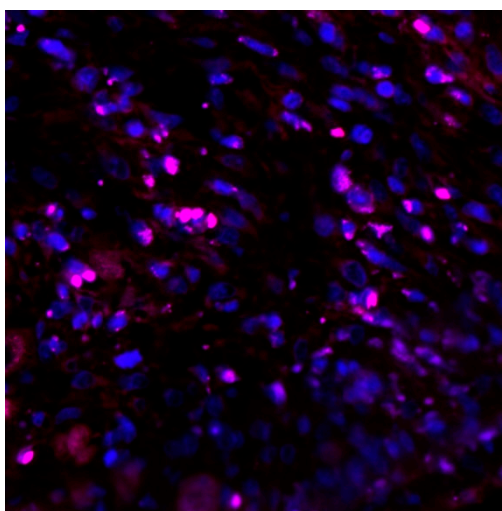

Supplement: s1 [file s1]
